# Supplementary material for: Autoxidation of glycols used in inhalable daily products: implications for the use of artificial fogs and e-cigarettes
Source: Royal Society of Chemistry journal article supplement (doi:10.1039/d3em00214d), 2023-01-01
Supplement: d3em00214d1.pdf [file d3em00214d1.pdf]

1 **Supporting Information For:**

2 **Aqueous Autoxidation of Common Glycols in the Indoor Environment**

3 Xinyang Guo, <sup>†</sup> Ya-Chun Chan, <sup>†</sup> Tania Gautam, <sup>†</sup> and Ran Zhao\*, <sup>†</sup>

4 <sup>†</sup>Department of Chemistry, University of Alberta, Edmonton, Alberta T6G 2G2, Canada

5 E-mail: rz@ualberta.ca

6 [Section S1. Experiment Details](#)

7 [Section S1.1. Sample Preparation](#)

**Summary of Sample Preparation**

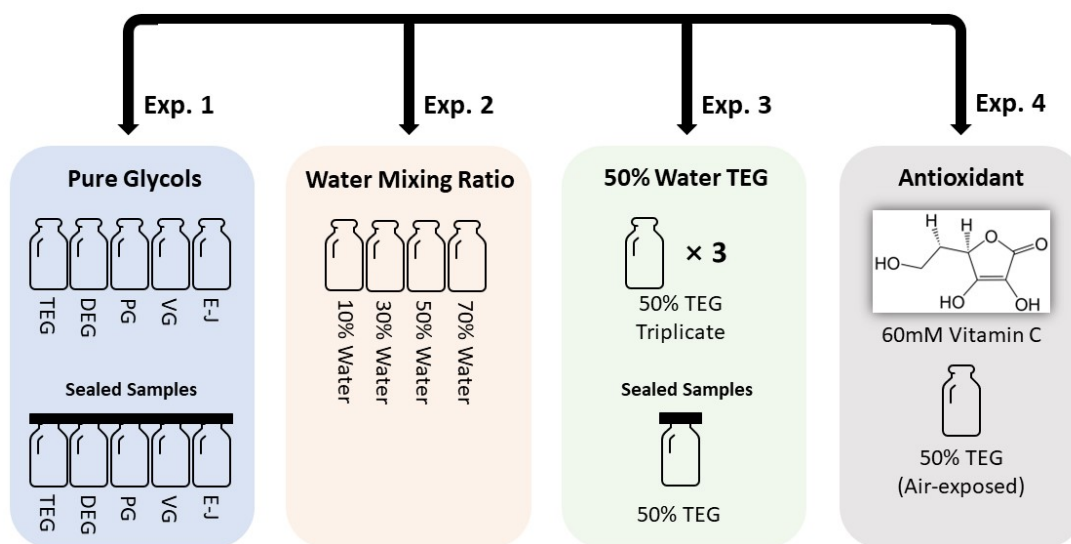

8

9 **Figure S1.** Summary of samples involved in this study; four sets of experiments were performed.

10 **Experiment 1:** Five different pure glycols were separated into two groups. The first group  
11 contains air-exposed samples, where 10 ml of the five glycols were added into 20 ml clear glass  
12 vials. These samples were exposed to room air all the time without vial caps while avoiding  
13 direct sunlight exposure. The second group was the same set of glycols, stored under the same  
14 condition as the first group, but with caps closed and sealed with parafilm.

15 **Experiment 2:** Three vials containing 10 ml of 50% (v/v) TEG were prepared by mixing 5 ml of  
16 water and 5 ml of TEG. The sealed 50% TEG was prepared in the same way. Triplicate 50% TEG  
17 samples were stored under room conditions without vial caps, and the sealed 50% TEG samples  
18 were capped with parafilm sealing. Masses of 50% TEG triplicate were monitored by an  
19 analytical balance, to track the water evaporation from the mixture.

20 **Experiment 3:** Four vials containing 10 ml of TEGs with varying water mixing ratios were  
21 prepared. Specifically, 1 ml, 3 ml, 5 ml, and 7 ml of water were added to different volumes of  
22 TEG to achieve a total volume of 10 ml. These four samples represent varying volumetric water  
23 mixing ratios of 10% to 70%. All samples were stored under room conditions without vial caps,  
24 their masses were monitored weekly to track water evaporation.

25 **Experiment 4:** 106 mg of L-ascorbic acid (Vitamin C) solid was added into 10 ml of 50% TEG  
26 mixture, resulting in a 60 mM final concentration of Vitamin C. This sample was stored under  
27 room conditions without the vial cap, and its mass was also recorded weekly.

## 28 Section S2. Instrumental Settings

29

|                                      |                                                      |
|--------------------------------------|------------------------------------------------------|
| <b>Injection volume</b>              | 2 $\mu$ L                                            |
| <b>Solvent A</b>                     | 0.1% (v/v) Formic Acid in MQ Water                   |
| <b>Solvent B</b>                     | 0.1% Formic Acid in ACN                              |
| <b>Flow Rate</b>                     | 400 $\mu$ L/min                                      |
| <b>Gradient</b>                      | See <b>Table S2</b>                                  |
| <b>Column</b>                        | Luna Omega C18 column<br>150 mm x 2.1 mm x 3 $\mu$ m |
| <b>Acquisition Time</b>              | 20 min                                               |
| <b>Scanning Mode</b>                 | Negative                                             |
| <b>Spray Voltage</b>                 | -3.5 kV                                              |
| <b>Sheath Gas Flow Rate</b>          | 40 a.u.                                              |
| <b>Aux Gas Flow Rate</b>             | 8 a.u.                                               |
| <b>Sweep Gas Flow Rate</b>           | 0 a.u.                                               |
| <b>Capillary Temp</b>                | 150 $^{\circ}$ C                                     |
| <b>Capillary Voltage</b>             | -35 V                                                |
| <b>Tube Lens</b>                     | -51.88 V                                             |
| <b>Electron Multiplier 1 Voltage</b> | -783.44 V                                            |
| <b>Electron Multiplier 2 Voltage</b> | -853.44 V                                            |
| <b>Collision Gas (MSMS)</b>          | Helium                                               |
| <b>Normalized Collision Energy</b>   | 22~27 a.u.                                           |

30

31

**Table S2. LC gradient for derived carbonyls**

| Time /min    | Flowrate $\mu\text{L}/\text{min}$ | Solvent A | Solvent B |
|--------------|-----------------------------------|-----------|-----------|
| <b>0.00</b>  | 400                               | 68.0      | 32.0      |
| <b>5.00</b>  | 400                               | 68.0      | 32.0      |
| <b>10.00</b> | 400                               | 55.0      | 45.0      |
| <b>15.00</b> | 400                               | 30.0      | 70.0      |
| <b>18.00</b> | 400                               | 10.0      | 90.0      |
| <b>20.00</b> | 400                               | 10.0      | 90.0      |

32

33 [Section S3. Iodometry-UV-Vis Peroxide Quantitation](#) <sup>[1]</sup>

34 [Section S3.1 Solutions Involved](#)

35 **1 M CH<sub>3</sub>COOH solution:** prepared in MilliQ water and kept in the refrigerator for storage.

36 **1.5 M KI solution:** prepared in MilliQ water. KI solution is prepared fresh every time before the  
37 experiment.

38 **H<sub>2</sub>O<sub>2</sub> solution:** Served as calibration standards, ranging from 0 to 50  $\mu\text{M}$ . It is prepared from the  
39 concentrated 30% H<sub>2</sub>O<sub>2</sub> stock solution and serial dilution. Prepared fresh before use.

40 **Sample for analysis:** One UV-Vis sample is consisting of 200  $\mu\text{L}$  KI solution, 150  $\mu\text{L}$  CH<sub>3</sub>COOH  
41 solution, and corresponding volume glycol solution, and filled up with MQ water to a total  
42 volume of 5 ml. The volume of glycol was varying to reach the desired dilution (1:400 for TEG,  
43 1:10 for PG, VG, and DEG). For instance, the TEG sample for UV-Vis contains KI solution,  
44 CH<sub>3</sub>COOH solution, 11.6  $\mu\text{L}$  of TEG, and 4.6 ml of water. UV-Vis samples were allowed to react  
45 under room conditions for one hour before the analysis. **Figure S2** justified the reaction  
46 completeness.

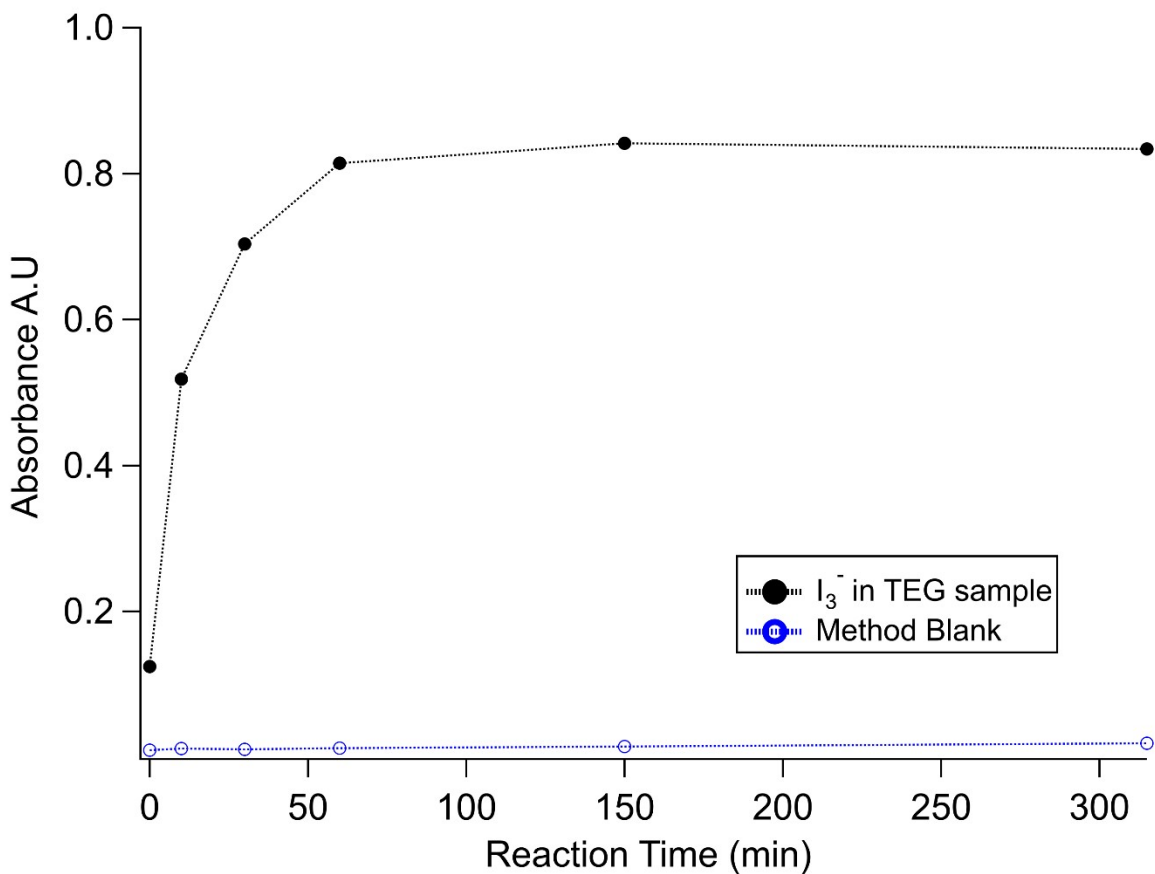

47

48 **Figure S2.** The absorbance of TEG sample in iodometry over time. We consider 60 min as the  
 49 reaction completion time, due to the longer reaction time can be biased by the reaction  
 50 between ambient oxygen and iodide ions.

51 [Section S3.2 Instrumentation](#)

52 The Agilent 8453 UV/VIS spectrophotometer was employed to obtain the absorbance value.

53 The spectrum is collected from  $\lambda=200$  to 1200 nm in a 1 cm path length semi-micro quartz  
 54 cuvette from Fischer. A standard solution of 25 mM hydrogen peroxide was measured on every  
 55 analytical day to prevent any instrumental variation.

56 [Section S3.3 Calibration of Peroxide](#)

57 Two calibration curves were constructed at the beginning and the end of the experiment,  
 58 shown in **Figures S3 and S4** below, this is to evaluate the instrumental variation throughout the  
 59 experiment.

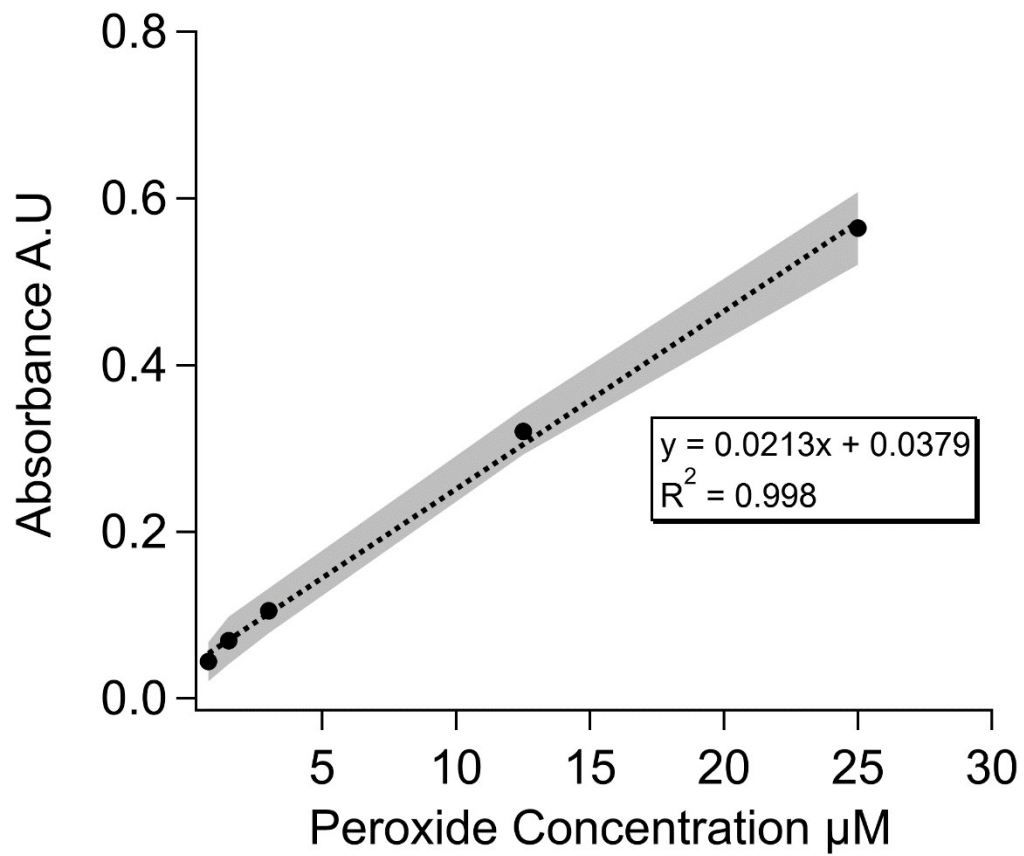

60

61 **Figure S3.** Iodometry-UV-Vis calibration curve at the beginning of the experiment, done in  
62 triplicates. Plotted is the average absorbance of three curves against concentration. The shaded  
63 area is the standard deviation of the triplicates.

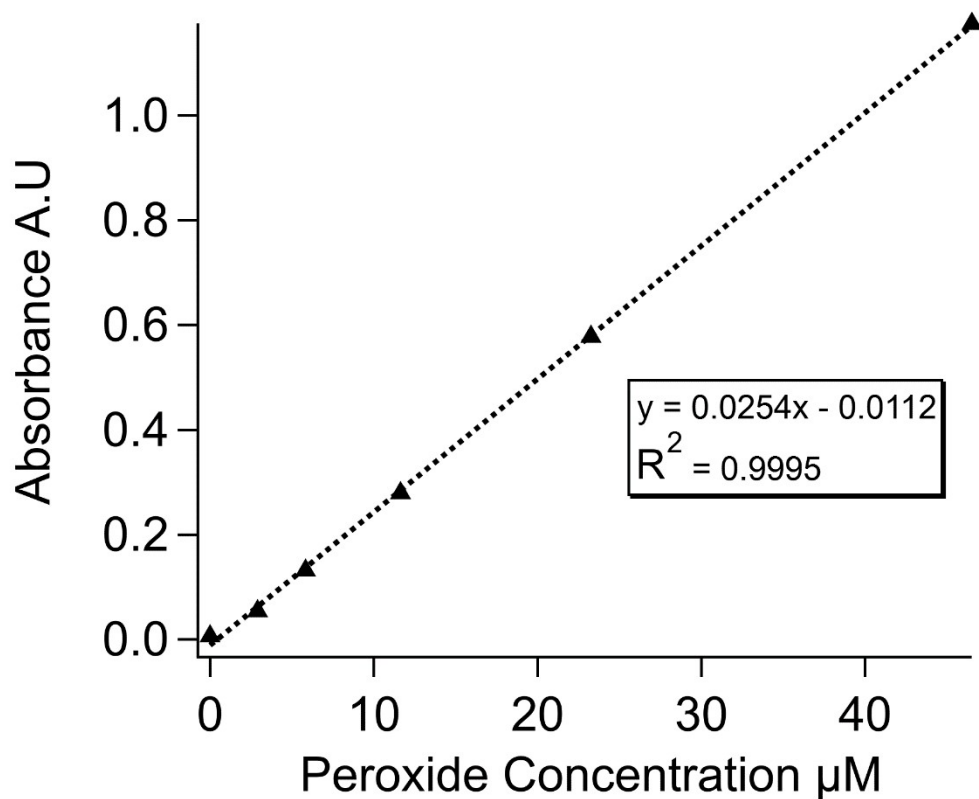

64

65 **Figure S4.** Iodometry-UV-Vis calibration curve at the end of the experiment. This calibration has  
 66 only been done once.

67 Section S4. Quantification of Carbonyls

| Table S3. Detailed Carbonyl Concentrations (μM) |              |                |              |                |
|-------------------------------------------------|--------------|----------------|--------------|----------------|
|                                                 | Week 1-2     |                | Week 6-8     |                |
|                                                 | Formaldehyde | Glycolaldehyde | Formaldehyde | Glycolaldehyde |
| Air-PG                                          | 119          | 154            | 274          | 207            |
| Sealed-PG                                       | 95           | 95             | 126          | 130            |
| Air-DEG                                         | 144          | 140            | 153          | 140            |
| Sealed-DEG                                      | 150          | 155            | 158          | 160            |
| Air-VG                                          | 273          | 303            | 353          | 278            |
| Sealed-VG                                       | 202          | 156            | 187          | 169            |
| Air-EJ                                          | 618          | 592            | 952          | 590            |
| Sealed-EJ                                       | 553          | 495            | 625          | 617            |
| Air-TEG                                         | 1951         | 2859           | 3317         | 6377           |
| Sealed-TEG                                      | 2024         | 3063           | 2391         | 4414           |

68

69

70 Section S5. Quality Control

71 We identified two major factors that can potentially induce bias in our results. The first one is  
72 the loss of water, causing increased concentrations of chemicals. We monitored the loss of  
73 water from all water gradients and fitted a first-order decay of the remaining solution, shown in  
74 **Figure S5**:

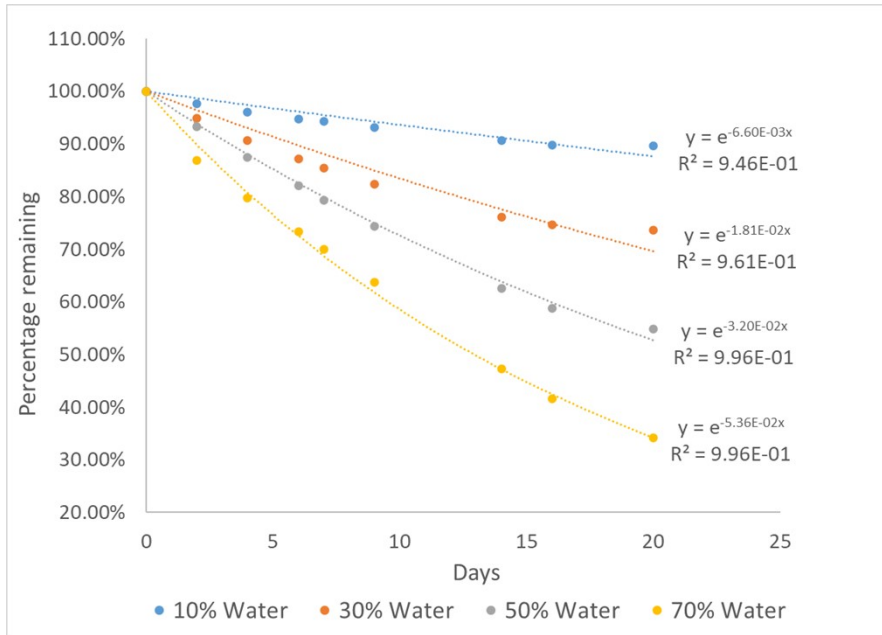

75

76 **Figure S5.** First-order fitment of remaining glycol solution time during constant water  
77 evaporation.

78 We also observed a varying recovery rate of formaldehyde in pure glycol and 50% glycol  
79 samples, despite standard addition being applied. Thus, we assumed a linear fitment of  
80 recovery rate from 0% to 50% of water, and extrapolated to 70%, shown in **Figure S6**:

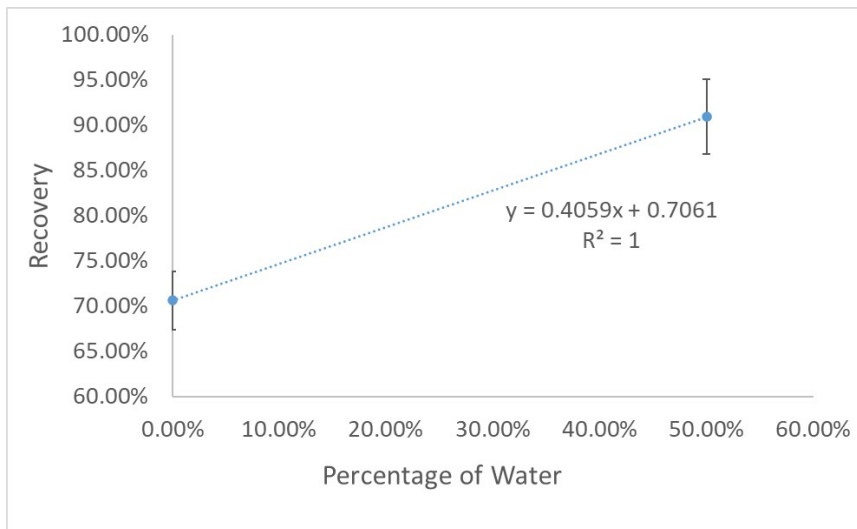

81

82 **Figure S6.** Assumed linear recovery rate in different mixing ratios of water. The error bar  
83 represents the standard deviation of recovery rates obtained from four replicates.

84

## 85 Reference

- 86 1. Mutzel (formerly Heinold), Anke & Rodigast, Maria & Iinuma, Yoshiteru & Böge, Olaf &  
87 Herrmann, Hartmut. (2013). An improved method for the quantification of SOA bound peroxides.  
88 Atmospheric Environment. 67. 365-369. 10.1016/j.atmosenv.2012.11.012.
